# Supplementary material for: Star-PCL shape memory polymer (SMP) scaffolds with tunable transition temperatures for enhanced utility
Source: Royal Society of Chemistry journal article supplement (doi:10.1039/d4tb00050a), 2024-01-01
Supplement: d4tb00050a1.pdf [file d4tb00050a1.pdf]

## Supporting Information

### ***Star-PCL Shape Memory Polymer (SMP) Scaffolds with Tunable Transition Temperatures for Enhanced Utility***

*Courteney T. Roberts,<sup>a</sup> Sarah K. Beck,<sup>a</sup> C. Mabel Prejean,<sup>a</sup> Lance M. Graul,<sup>a</sup>  
Duncan J. Maitland,<sup>a</sup> and Melissa A. Grunlan<sup>a,b,c\*</sup>*

<sup>a</sup>Department of Biomedical Engineering, <sup>b</sup>Department of Materials Science and Engineering,  
<sup>c</sup>Department of Chemistry, Texas A&M University, College Station, Texas 77843, United States.

\* [mgrunlan@tamu.edu](mailto:mgrunlan@tamu.edu) (corresponding author)

14 Pages

9 Figures

9 Tables

3 videos

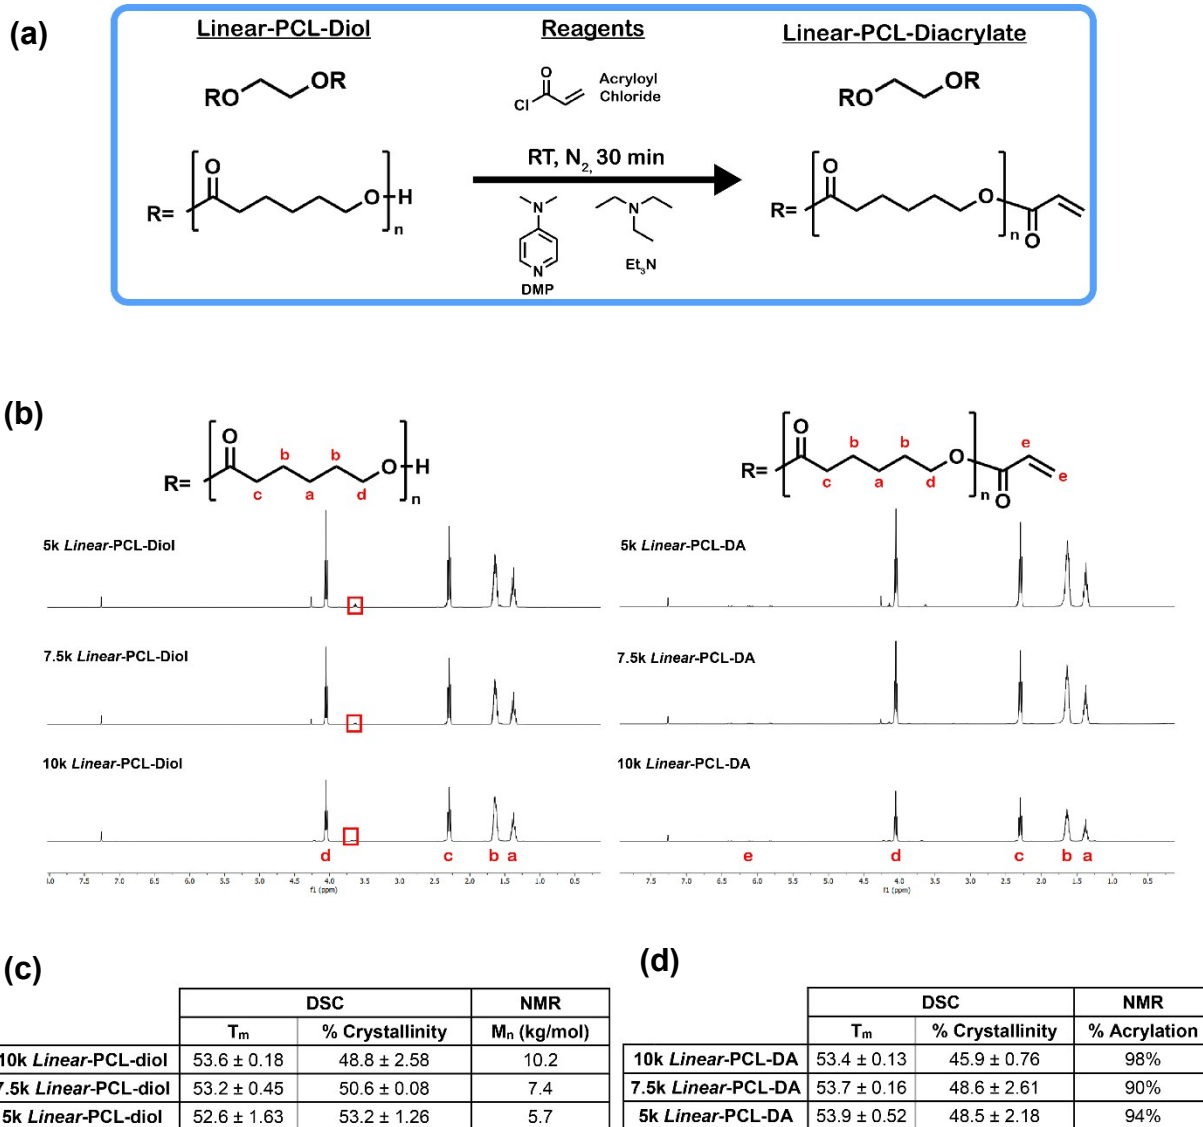

**Figure S1.** (a) Synthetic scheme for the acrylation of *linear*-PCL-diol to produce *linear*-PCL-DA. (b)  $^1\text{H}$  NMR spectra for *linear*-PCL-diols and *linear*-PCL-DAs of different  $M_n$ s. (c) Summary of *linear*-PCL-diols' thermal properties (from DSC), and  $M_n$  (from  $^1\text{H}$  NMR). (d) Summary of the *linear*-PCL-DA macromers' thermal properties (from DSC), and % acrylation (from  $^1\text{H}$  NMR).

(a)

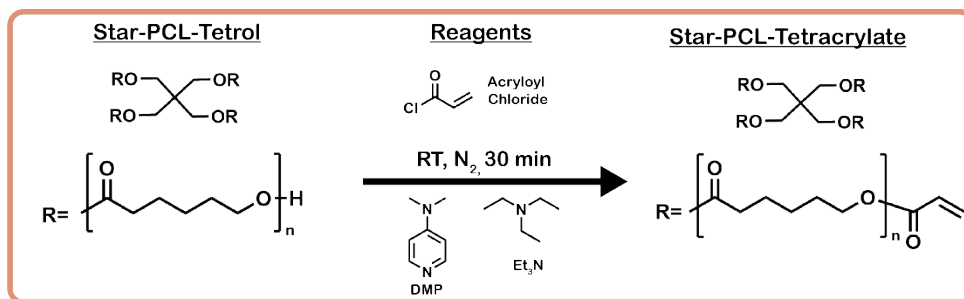

(b)

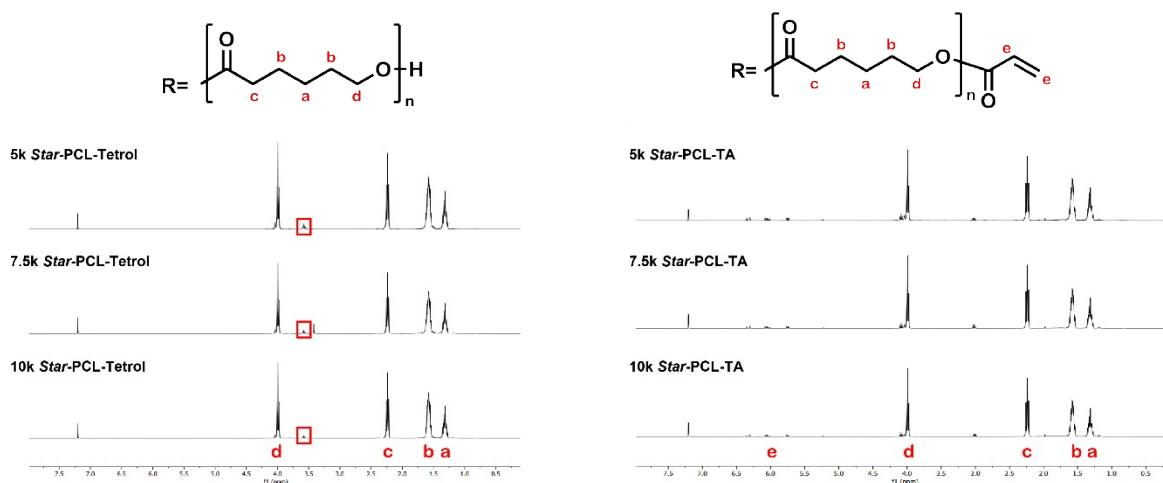

(c)

|                             | DSC            |                 | NMR                     |
|-----------------------------|----------------|-----------------|-------------------------|
|                             | T <sub>m</sub> | % Crystallinity | M <sub>n</sub> (kg/mol) |
| 10k <i>Star-PCL-tetrol</i>  | 48.8 ± 1.44    | 42.2 ± 4.93     | 10.3                    |
| 7.5k <i>Star-PCL-tetrol</i> | 48.4 ± 0.42    | 43.9 ± 1.10     | 7.5                     |
| 5k <i>Star-PCL-tetrol</i>   | 47.3 ± 1.10    | 43.9 ± 4.97     | 5.7                     |

(d)

|                         | DSC            |                 | NMR          |
|-------------------------|----------------|-----------------|--------------|
|                         | T <sub>m</sub> | % Crystallinity | % Acrylation |
| 10k <i>Star-PCL-TA</i>  | 49.0 ± 0.46    | 50.5 ± 2.77     | 89%          |
| 7.5k <i>Star-PCL-TA</i> | 46.7 ± 0.57    | 44.4 ± 1.30     | 93%          |
| 5k <i>Star-PCL-TA</i>   | 43.5 ± 0.34    | 45.7 ± 0.58     | 96%          |

**Figure S2.** (a) Synthetic scheme for the acrylation of *star-PCL-tetrol* to produce *star-PCL-TA*. (b) <sup>1</sup>H NMR spectra for *star-PCL-tetrol*s and *star-PCL-TA*s of different M<sub>n</sub>s. (c) Summary of *star-PCL-tetrol*s' thermal properties (from DSC), and M<sub>n</sub> (from <sup>1</sup>H NMR). (d) Summary of *star-PCL-TA* macromers' thermal properties (from DSC) and % acrylation (from <sup>1</sup>H NMR).

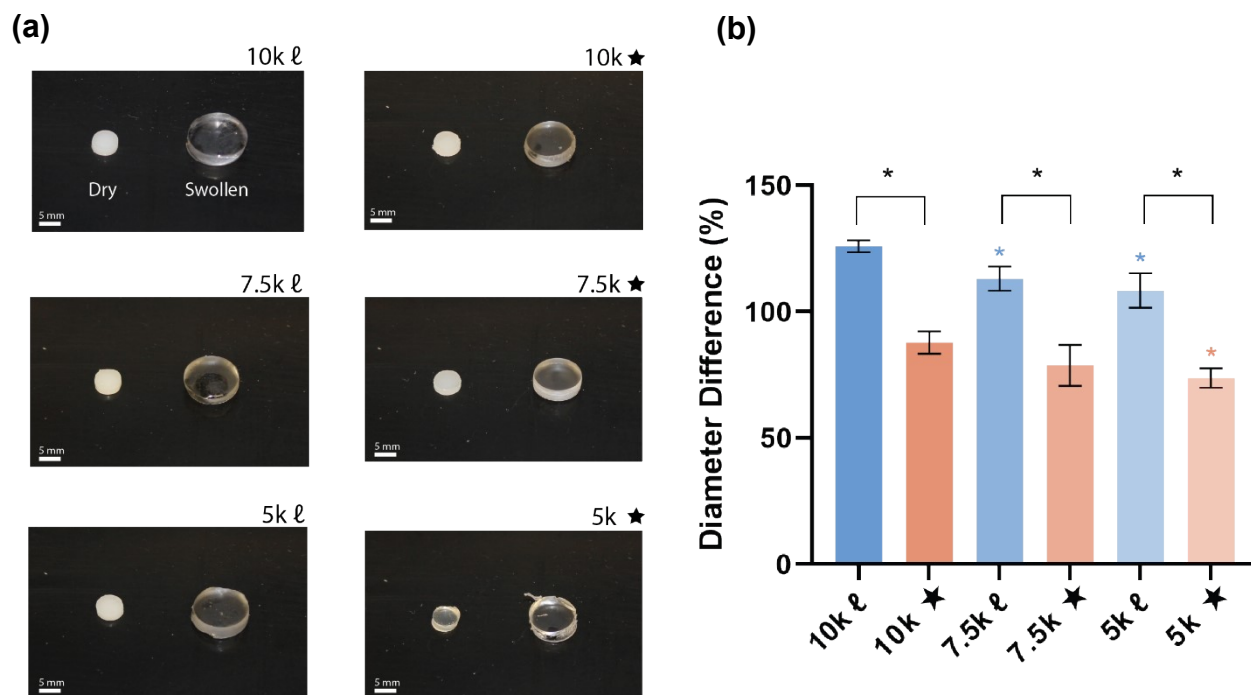

**Figure S3.** Crosslink density assessed via swelling tests of solid film discs. **(a)** For each macromer, image of resulting dry (left) and solvent-swollen (right) specimens. **(b)** Corresponding % diameter difference between a dry and solvent-swollen discs of a given composition. “Black \*”  $p < 0.05$  linear- versus star- films of same  $M_n$ . “Blue \*”  $p < 0.05$  versus 10kℓ. “Pink \*”  $p < 0.05$  versus 10k★.

**Table S1.** Crosslink density assessed via swelling tests of solid film discs.

|        | Diameter Difference (%) |
|--------|-------------------------|
| 10k ℓ  | 125.9 ± 2.34            |
| 10k ★  | 87.8 ± 4.39             |
| 7.5k ℓ | 113.1 ± 4.83            |
| 7.5k ★ | 78.9 ± 8.12             |
| 5k ℓ   | 108.4 ± 6.89            |
| 5k ★   | 73.8 ± 3.92             |

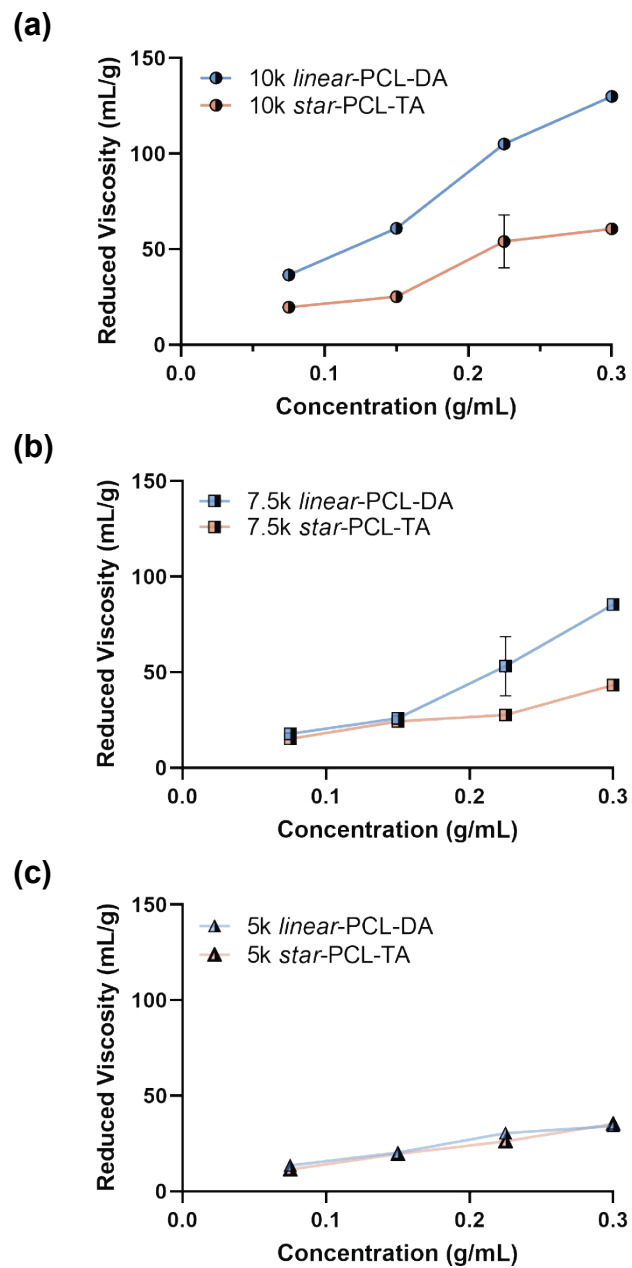

**Figure S4.** Reduced viscosity ( $\eta_{red}$ ) of acrylated macromer solutions of varying  $M_n$ s: **(a)**  $10\text{ kg mol}^{-1}$ , **(b)**  $7.5\text{ kg mol}^{-1}$ , and **(c)**  $5\text{ kg mol}^{-1}$ .

**Table S2.** Reduced viscosity ( $\eta_{\text{red}}$ ) of acrylated macromer solutions of varying  $M_n$ s at designated concentrations.

|        | <b>Reduced Viscosity (mL/g) at Concentration</b> |                   |                   |                   |
|--------|--------------------------------------------------|-------------------|-------------------|-------------------|
|        | <b>0.075 g/mL</b>                                | <b>0.150 g/mL</b> | <b>0.225 g/mL</b> | <b>0.300 g/mL</b> |
| 10k ℓ  | 36.6 ± 0.71                                      | 60.9 ± 1.49       | 105.1 ± 2.84      | 129.9 ± 2.81      |
| 10k ★  | 19.7 ± 0.72                                      | 25.2 ± 0.37       | 54.1 ± 13.93      | 60.7 ± 1.48       |
| 7.5k ℓ | 17.9 ± 0.19                                      | 25.9 ± 2.37       | 53.2 ± 15.57      | 85.5 ± 1.88       |
| 7.5k ★ | 15.2 ± 0.42                                      | 24.31 ± 0.55      | 27.6 ± 1.32       | 43.4 ± 1.22       |
| 5k ℓ   | 13.6 ± 0.48                                      | 20.3 ± 0.31       | 30.4 ± 4.30       | 34.2 ± 0.70       |
| 5k ★   | 11.5 ± 0.08                                      | 19.5 ± 0.41       | 26.2 ± 0.21       | 35.3 ± 1.08       |

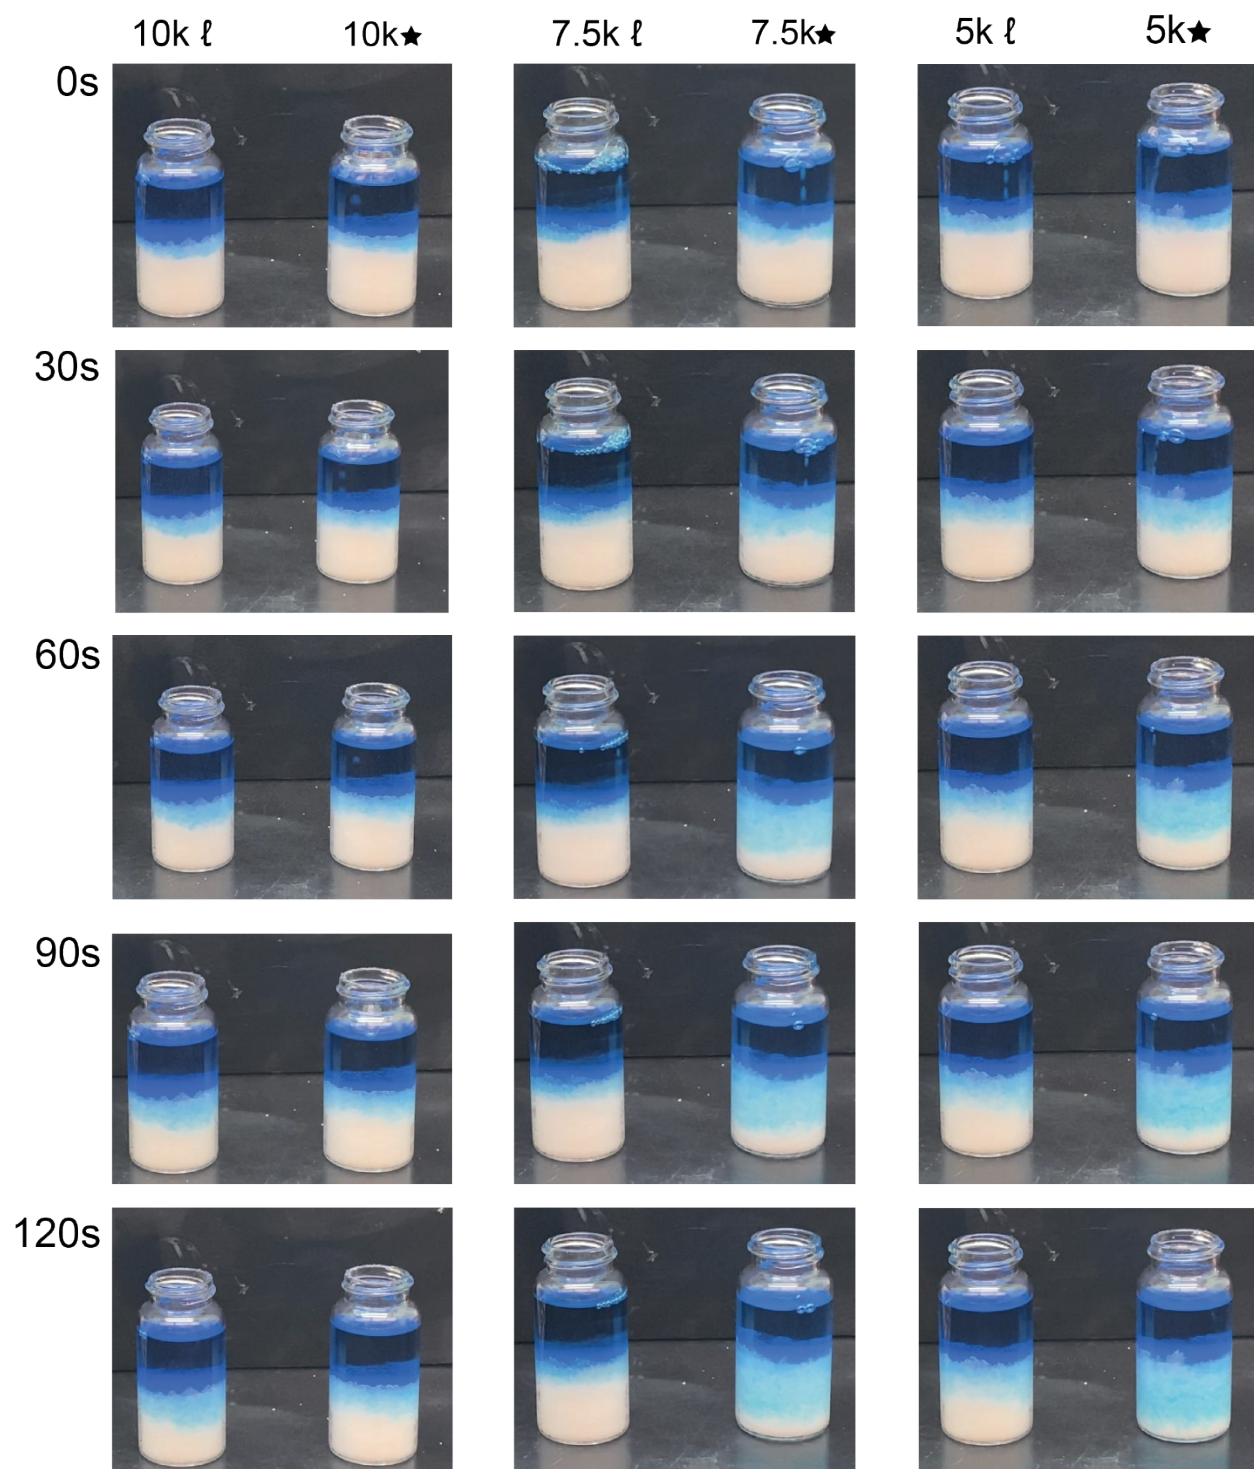

**Figure S5.** Dye-containing macromer solution diffusion through a salt mold. Accompanied videos provided.

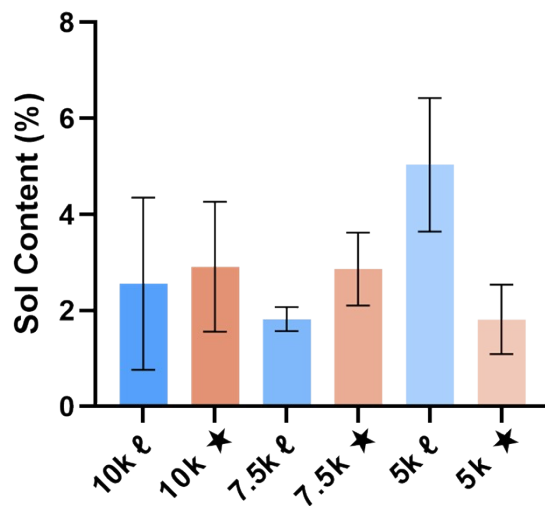

Figure S6. Sol content (%) of scaffolds.

Table S3. Sol content (%) of scaffolds.

|        | Sol Content (%) |
|--------|-----------------|
| 10k ℓ  | 2.6 ± 1.80      |
| 10k ★  | 2.9 ± 1.35      |
| 7.5k ℓ | 1.8 ± 0.25      |
| 7.5k ★ | 2.9 ± 0.76      |
| 5k ℓ   | 5.0 ± 1.39      |
| 5k ★   | 1.8 ± 0.72      |



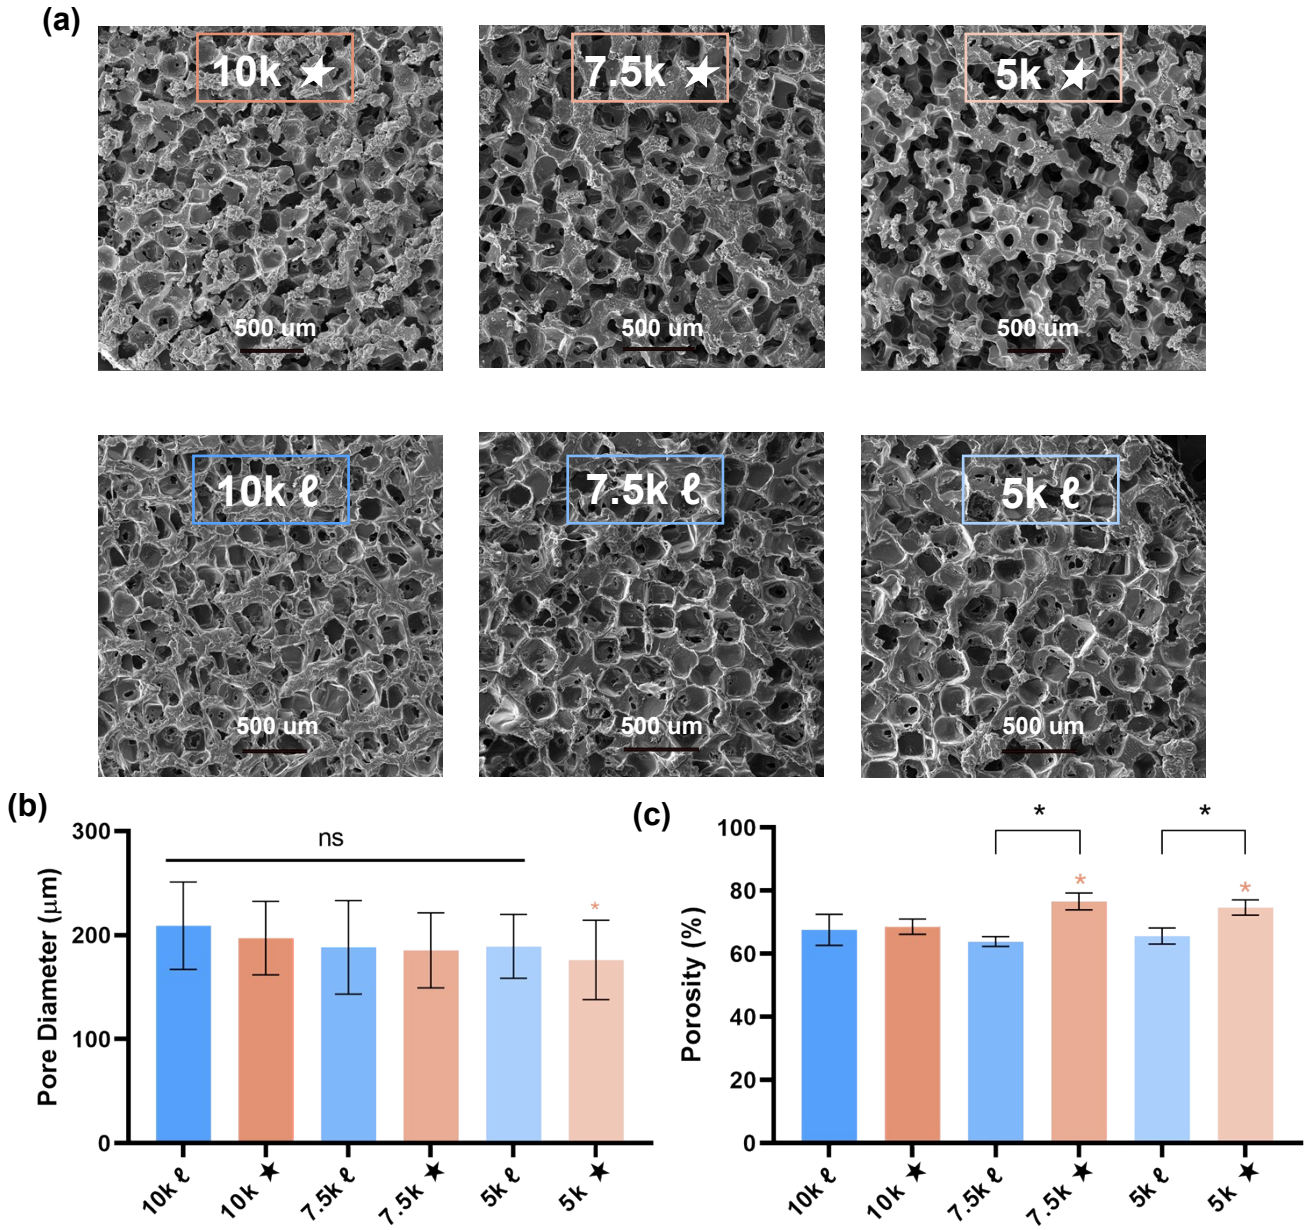

**Figure S7.** (a) SEM images of the scaffold cross-sections. (b) Scaffold pore diameters. (c) % Porosity of scaffolds. “Black \*”  $p < 0.05$  comparing *linear*- and *star*- scaffolds of same  $M_n$ . “Blue \*”  $p < 0.05$  versus 10k $\epsilon$ . “Pink \*”  $p < 0.05$  versus 10k $\star$ .

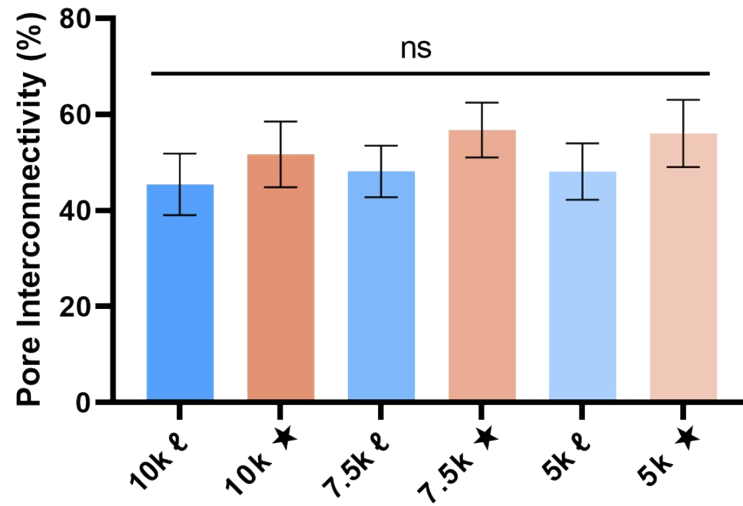

Figure S8. Scaffold pore interconnectivity.

Table S4. Scaffold pore size, % porosity, and % pore interconnectivity.

|        | Pore Size<br>( $\mu\text{m}$ ) | Porosity<br>(%) | Pore<br>Interconnectivity<br>(%) |
|--------|--------------------------------|-----------------|----------------------------------|
| 10k ℓ  | 209.1 ± 42.00                  | 67.6 ± 4.93     | 45.4 ± 6.40                      |
| 10k ★  | 197.2 ± 35.21                  | 68.6 ± 2.43     | 51.7 ± 6.85                      |
| 7.5k ℓ | 188.4 ± 44.89                  | 63.9 ± 1.53     | 48.1 ± 5.36                      |
| 7.5k ★ | 185.4 ± 36.03                  | 76.6 ± 2.67     | 56.7 ± 5.69                      |
| 5k ℓ   | 189.2 ± 30.60                  | 65.7 ± 2.58     | 48.1 ± 5.84                      |
| 5k ★   | 176.2 ± 38.20                  | 74.7 ± 2.43     | 56.0 ± 6.98                      |

**Table S5.**  $T_m$  and % crystallinity of scaffolds.

|        | $T_{m,onset}$ (°C) | $T_m$ (°C) [“midpoint”] | Crystallinity (%) |
|--------|--------------------|-------------------------|-------------------|
| 10k ℓ  | 51.3 ± 0.13        | 56.7 ± 0.11             | 46.5 ± 1.09       |
| 10k ★  | 39.6 ± 2.25        | 46.2 ± 1.53             | 26.7 ± 2.07       |
| 7.5k ℓ | 48.6 ± 1.15        | 52.2 ± 0.93             | 37.1 ± 0.35       |
| 7.5k ★ | 34.3 ± 4.04        | 40.4 ± 2.12             | 22.4 ± 5.55       |
| 5k ℓ   | 45.9 ± 0.27        | 51.4 ± 0.11             | 35.3 ± 1.23       |
| 5k ★   | 17.8 ± 0.52        | 29.1 ± 0.42             | 18.7 ± 0.30       |

**Table S6.** Scaffold shape fixity ( $R_f$ ) and shape recovery ( $R_r$ ) for cycle 1 and cycle 2.

|        | $R_{f,cycle 1}$ (%) | $R_{r,cycle 1}$ (%) | $R_{f,cycle 2}$ (%) | $R_{r,cycle 2}$ (%) |
|--------|---------------------|---------------------|---------------------|---------------------|
| 10k ℓ  | 99.3 ± 7.77         | 108.6 ± 6.28        | 103.5 ± 3.62        | 97.0 ± 1.90         |
| 10k ★  | 103.6 ± 3.43        | 103.5 ± 3.79        | 101.5 ± 4.75        | 96.4 ± 1.02         |
| 7.5k ℓ | 104.0 ± 4.17        | 100.8 ± 0.70        | 102.3 ± 2.62        | 101.3 ± 3.46        |
| 7.5k ★ | 98.3 ± 3.46         | 97.3 ± 3.27         | 102.7 ± 5.52        | 101.8 ± 5.05        |
| 5k ℓ   | 97.6 ± 1.72         | 99.9 ± 0.58         | 95.3 ± 3.12         | 99.7 ± 1.64         |
| 5k ★   | 107.3 ± 4.02        | 98.8 ± 2.46         | 108.5 ± 3.43        | 99.9 ± 2.09         |

**Table S7.** Radial pressure exerted by scaffold at its  $T_m$ .

|        | <b>Radial Pressure<br/>(kPa)</b> |
|--------|----------------------------------|
| 10k ℓ  | 107 ± 32                         |
| 10k ★  | 273 ± 56                         |
| 7.5k ℓ | 122 ± 58                         |
| 7.5k ★ | 156 ± 85                         |
| 5k ℓ   | 77 ± 21                          |
| 5k ★   | 165 ± 61                         |

**Table S8.** Scaffold mass loss (%) during accelerated degradation study (0.1 M NaOH, 37 °C).

| <b>Time (day)</b> | <b>Composition</b> |              |              |              |              |              |
|-------------------|--------------------|--------------|--------------|--------------|--------------|--------------|
|                   | 10kℓ               | 10k★         | 7.5kℓ        | 7.5k★        | 5kℓ          | 5k★          |
| 1                 | 2.4 ± 3.24         | 0.5 ± 1.01   | 3.1 ± 3.16   | 12.0 ± 2.12  | 1.9 ± 0.80   | 0.3 ± 1.11   |
| 2                 | 2.5 ± 1.52         | 4.0 ± 1.79   | 1.1 ± 0.97   | 9.2 ± 6.06   | 2.6 ± 2.10   | 10.9 ± 10.90 |
| 3                 | 0.9 ± 1.25         | 3.4 ± 2.25   | 3.3 ± 0.99   | 7.8 ± 1.90   | 3.7 ± 2.24   | 25.3 ± 7.93  |
| 4                 | 1.7 ± 1.19         | 5.4 ± 2.46   | 4.8 ± 1.63   | 14.0 ± 4.50  | 9.2 ± 6.39   | 36.8 ± 8.89  |
| 5                 | 4.4 ± 1.34         | 6.6 ± 1.47   | 7.1 ± 1.57   | 33.5 ± 8.87  | 1.0 ± 2.03   | 57.0 ± 34.29 |
| 6                 | 5.7 ± 0.99         | 11.3 ± 2.99  | 9.7 ± 4.67   | 45.3 ± 17.79 | 7.7 ± 2.60   | 84.6 ± 18.98 |
| 7                 | 5.8 ± 2.88         | 16.6 ± 6.08  | 16.3 ± 2.34  | 50.5 ± 14.71 | 9.2 ± 2.29   | 97.9 ± 1.91  |
| 8                 | 27.8 ± 11.99       | 16.9 ± 5.65  | 17.0 ± 2.49  | 65.8 ± 31.67 | 9.7 ± 1.52   | 98.6 ± 1.73  |
| 9                 | 35.8 ± 10.22       | 29.8 ± 6.56  | 22.6 ± 7.04  | 96.7 ± 5.77  | 17.2 ± 13.30 | 100.0 ± 0.00 |
| 10                | 58.2 ± 28.05       | 35.2 ± 12.84 | 42.9 ± 10.20 | 97.6 ± 2.68  | 27.0 ± 18.06 | 100.0 ± 0.00 |
| 12                | 72.3 ± 11.29       | 69.1 ± 15.52 | 81.3 ± 32.40 | 100.0 ± 0.00 | 13.6 ± 5.26  | 100.0 ± 0.00 |
| 15                | 81.2 ± 22.58       | 100.0 ± 0.00 | 100.0 ± 0.00 | 100.0 ± 0.00 | 58.7 ± 5.83  | 100.0 ± 0.00 |

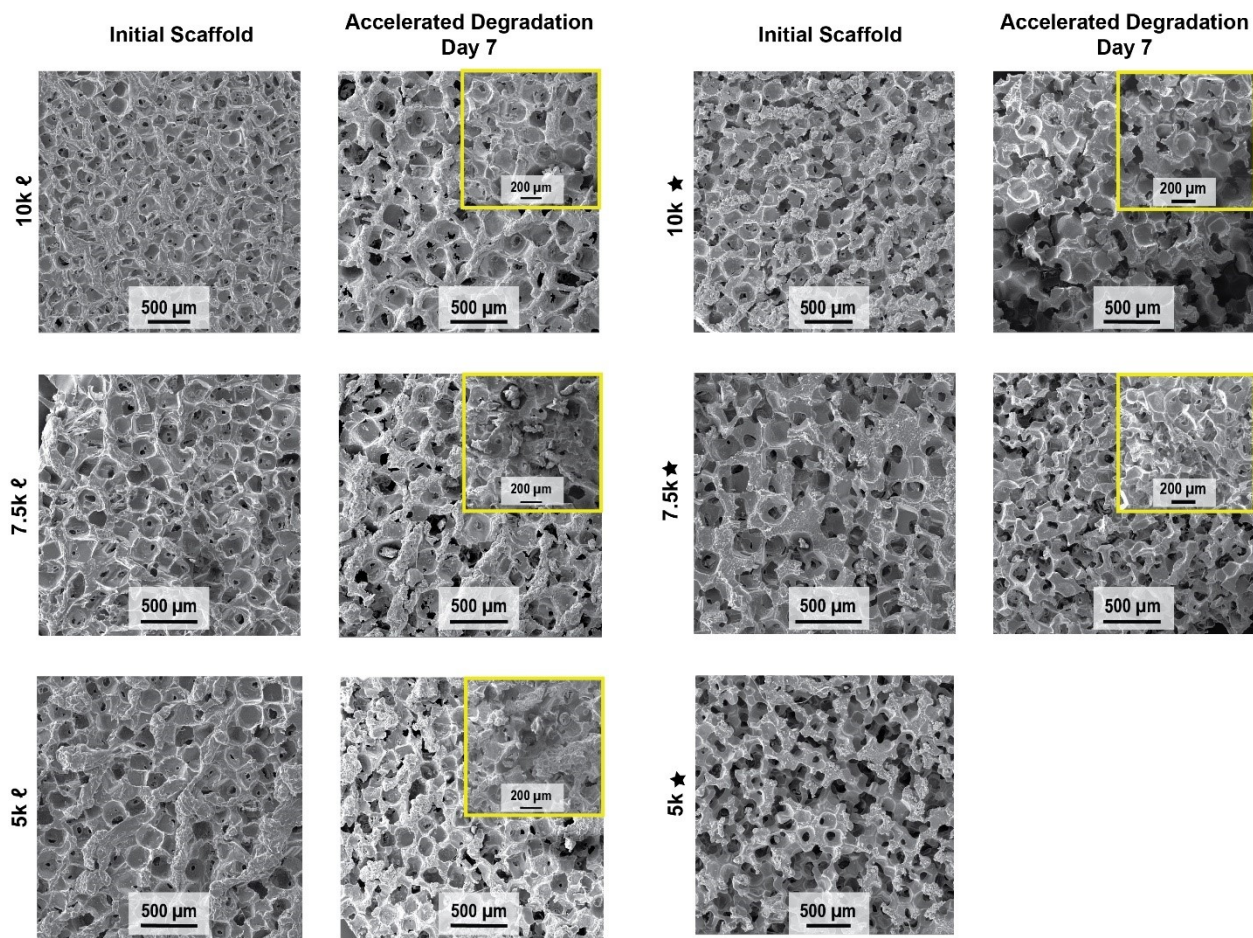

**Figure S9.** SEM images of initial scaffolds and scaffolds after 7 days in 0.1M NaOH (37 °C).

**Table S9.** Scaffold compressive mechanical properties.

|        | <b>Compressive Modulus (MPa)</b> | <b>Compressive Strength (MPa)</b> | <b>Compressive Toughness (MJ m<sup>-3</sup>)</b> |
|--------|----------------------------------|-----------------------------------|--------------------------------------------------|
| 10k ℓ  | 7.10 ± 2.20                      | 32.73 ± 1.93                      | 5.24 ± 0.68                                      |
| 10k ★  | 2.02 ± 0.68                      | 10.55 ± 3.57                      | 1.84 ± 0.46                                      |
| 7.5k ℓ | 5.54 ± 1.96                      | 31.97 ± 4.56                      | 4.35 ± 0.98                                      |
| 7.5k ★ | 1.30 ± 0.65                      | 7.30 ± 4.04                       | 1.23 ± 0.62                                      |
| 5k ℓ   | 4.65 ± 1.62                      | 27.74 ± 11.23                     | 4.29 ± 1.16                                      |
| 5k ★   | 0.69 ± 0.18                      | 5.37 ± 2.52                       | 0.86 ± 0.32                                      |
